# Supplementary material for: Dietary supplementation of Thai black rice bran extract and yeast beta-glucan protects the dextran sodium sulphate mediated colitis induced rat
Source: Royal Society of Chemistry journal article supplement (doi:10.1039/c6ra25548e), 2017-01-01
Supplement: c6ra25548e1.pdf [file c6ra25548e1.pdf]

### Supplementary Figure legends:

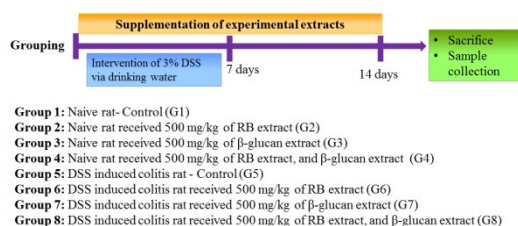

**Fig S1.** Schematic representation of experimental timeline and grouping.

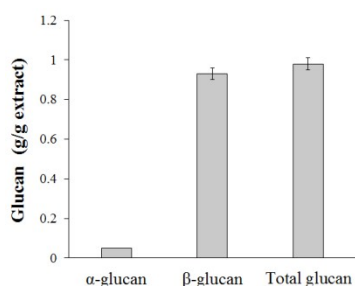

**Fig S2.** Glucan content of yeast. The extraction made up of  $930 \pm 30$ , and  $30 \pm 0$  mg/g of an extract of  $\beta$ -glucan, and  $\alpha$ -glucan, respectively.

**Table S1** Selected Histological parameters and scoring criteria

| S. No | Criterion                    | Definition                                    | Score |
|-------|------------------------------|-----------------------------------------------|-------|
| 1     | Loss of epithelium           | Normal                                        | 0     |
|       |                              | Mild: <10%                                    | 1     |
|       |                              | Moderate: 10-50%                              | 2     |
|       |                              | Severe: >50%; severe erosion                  | 3     |
| 2     | Loss of mucosal architecture | Normal                                        | 0     |
|       |                              | Mild: abnormality                             | 1     |
|       |                              | Moderate: diffuse or multifocal abnormalities | 2     |

|   |                                                           |                                                    |   |
|---|-----------------------------------------------------------|----------------------------------------------------|---|
|   |                                                           | Severe: diffuse or multifocal abnormalities        | 3 |
| 3 | Infiltration of mononuclear cells in lamina propria       | Normal                                             | 0 |
|   |                                                           | Mild: <10%                                         | 1 |
|   |                                                           | Moderate: 10-50%                                   | 2 |
|   |                                                           | Severe: >50%; dense infiltrate                     | 3 |
| 4 | Infiltration of polymorphonuclear cells in lamina propria | Normal                                             | 0 |
|   |                                                           | Mild: <10%                                         | 1 |
|   |                                                           | Moderate: 10-50%                                   | 2 |
|   |                                                           | Severe: >50%; dense infiltrate                     | 3 |
| 5 | Infiltration of inflammatory cells in submucosa           | Normal                                             | 0 |
|   |                                                           | Mild: <10%                                         | 1 |
|   |                                                           | Moderate: 10-50%                                   | 2 |
|   |                                                           | Severe: >50%; dense infiltrate                     | 3 |
| 6 | Cryptitis and abscess formation                           | Normal                                             | 0 |
|   |                                                           | Mild: local excess of neutrophils in part of crypt | 1 |
|   |                                                           | Moderate: marked attenuation                       | 2 |
|   |                                                           | Severe: unequivocal crypt destruction              | 3 |
| 7 | Goblet cell depletion                                     | Normal                                             | 0 |
|   |                                                           | Mild: <20%                                         | 1 |
|   |                                                           | Moderate: 20-50%                                   | 2 |
|   |                                                           | Severe: >50%                                       | 3 |

---

Note: the criterion was selected from previous study.<sup>5</sup>
